# Supplementary material for: Sn(ii) induced concentration dependent dynamic to static excimer conversion of a conjugated naphthalene derivative
Source: Royal Society of Chemistry journal article supplement (doi:10.1039/c5dt02146d), 2015-01-01
Supplement: c5dt02146d1.pdf [file c5dt02146d1.pdf]

## Electronic Supplementary Information (ESI)

### Sn(II) induced concentration dependent dynamic to static excimer conversion of a conjugated naphthalene derivative

Susanta Adhikari<sup>a\*</sup>, Sandip Mandal<sup>b</sup>, Avijit Ghosh<sup>a</sup>, Subhajit Guria<sup>a</sup> and Debasis Das<sup>b\*</sup>

<sup>a</sup>Department of Chemistry, University of Calcutta, 92, A.P.C. Road, Kolkata 700 009, West Bengal, India.

<sup>b</sup>Department of Chemistry, The University of Burdwan, Burdwan 713104, West Bengal, India

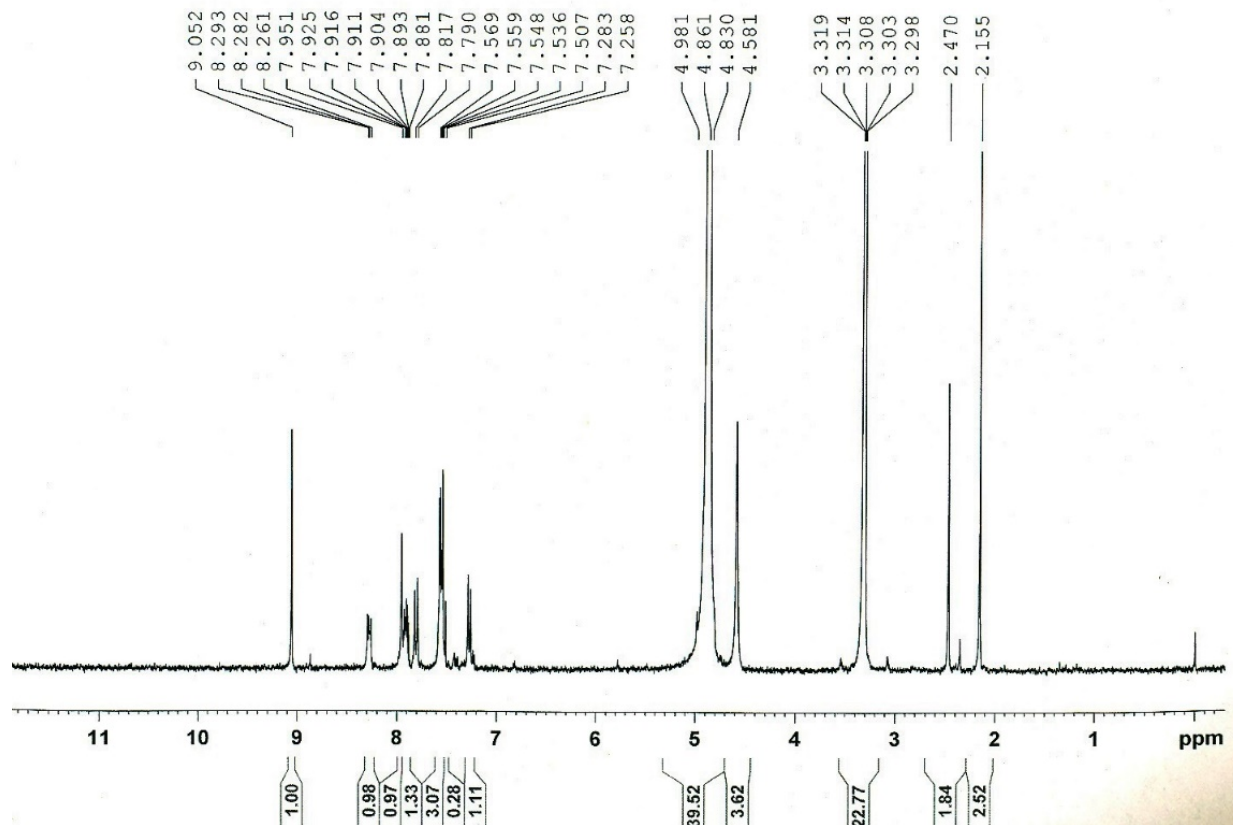

Figure S1 <sup>1</sup>H NMR spectrum of L in CD<sub>3</sub>OD

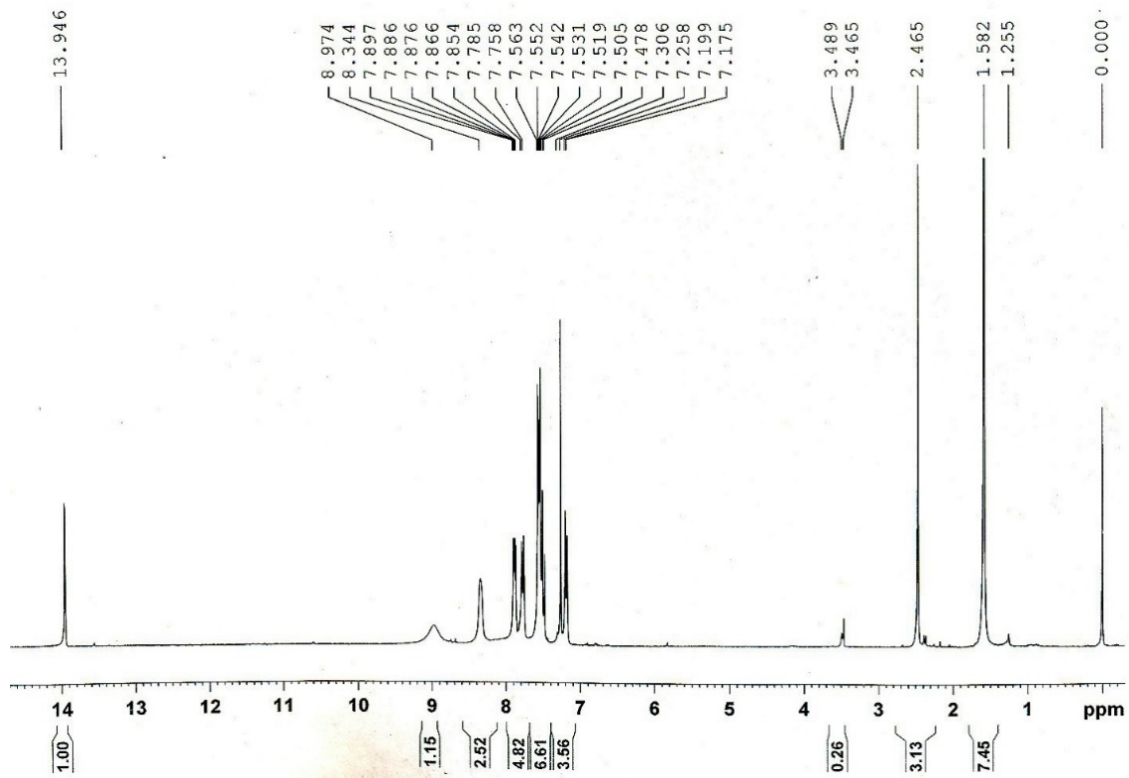

Figure S2 <sup>1</sup>H NMR spectrum of L in CDCl<sub>3</sub>

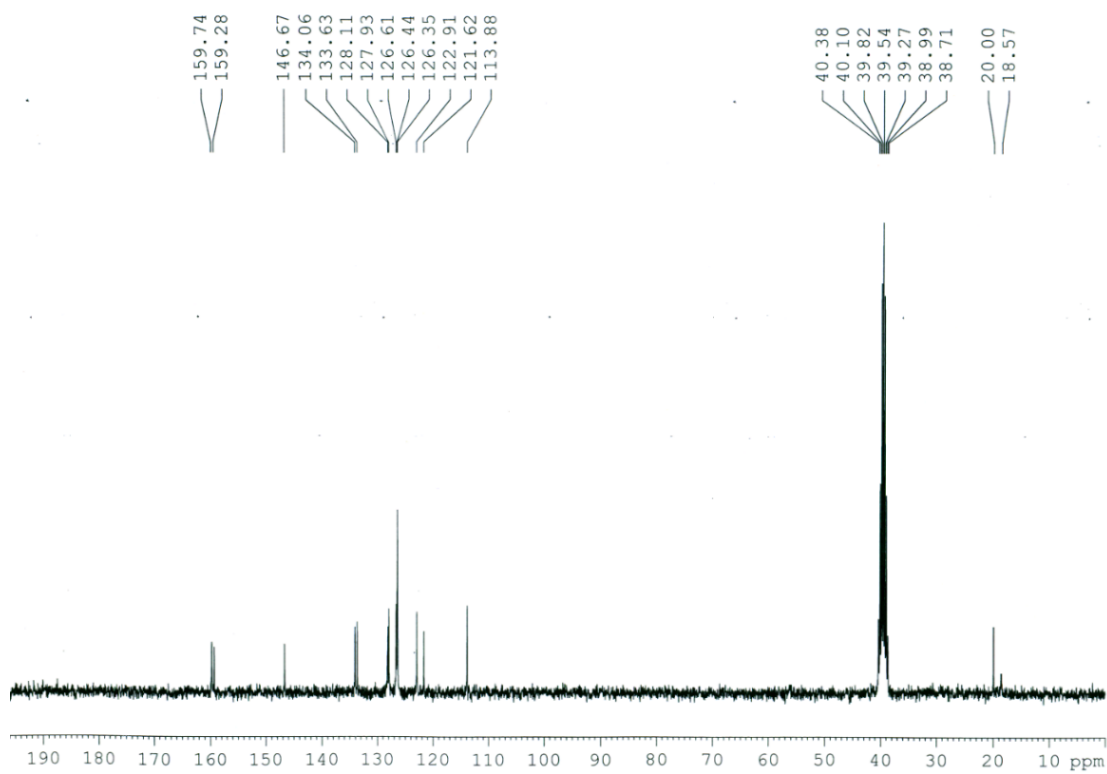

Figure S3 <sup>13</sup>C NMR spectrum of L in DMSO-*d*<sub>6</sub>

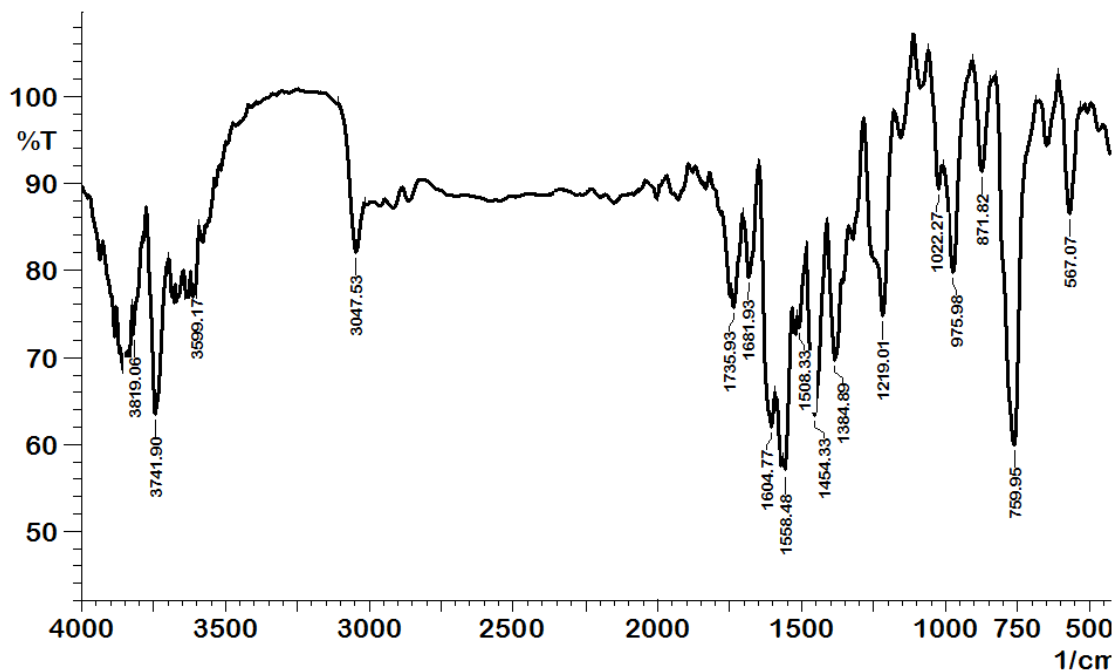

Figure S4. FTIR spectrum of L

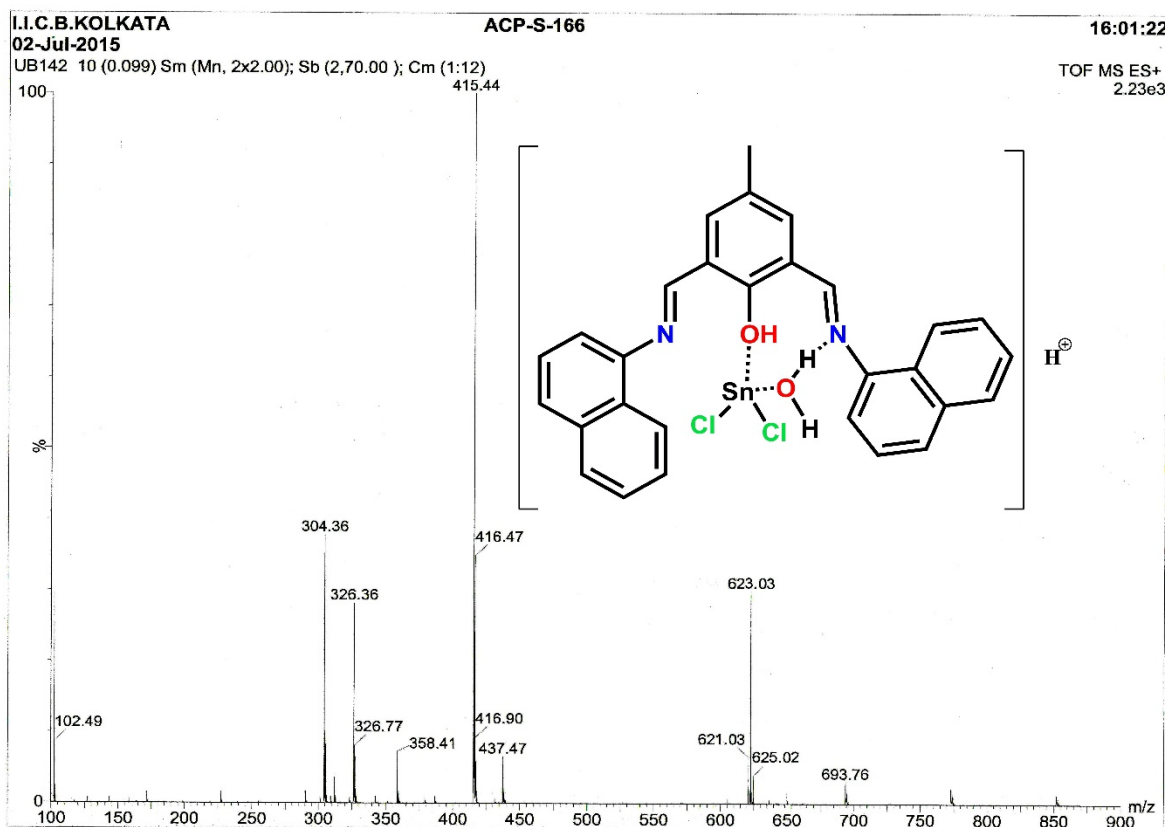

Figure S5. QTOF-MS spectrum of [L-SnCl<sub>2</sub>] complex in MeOH

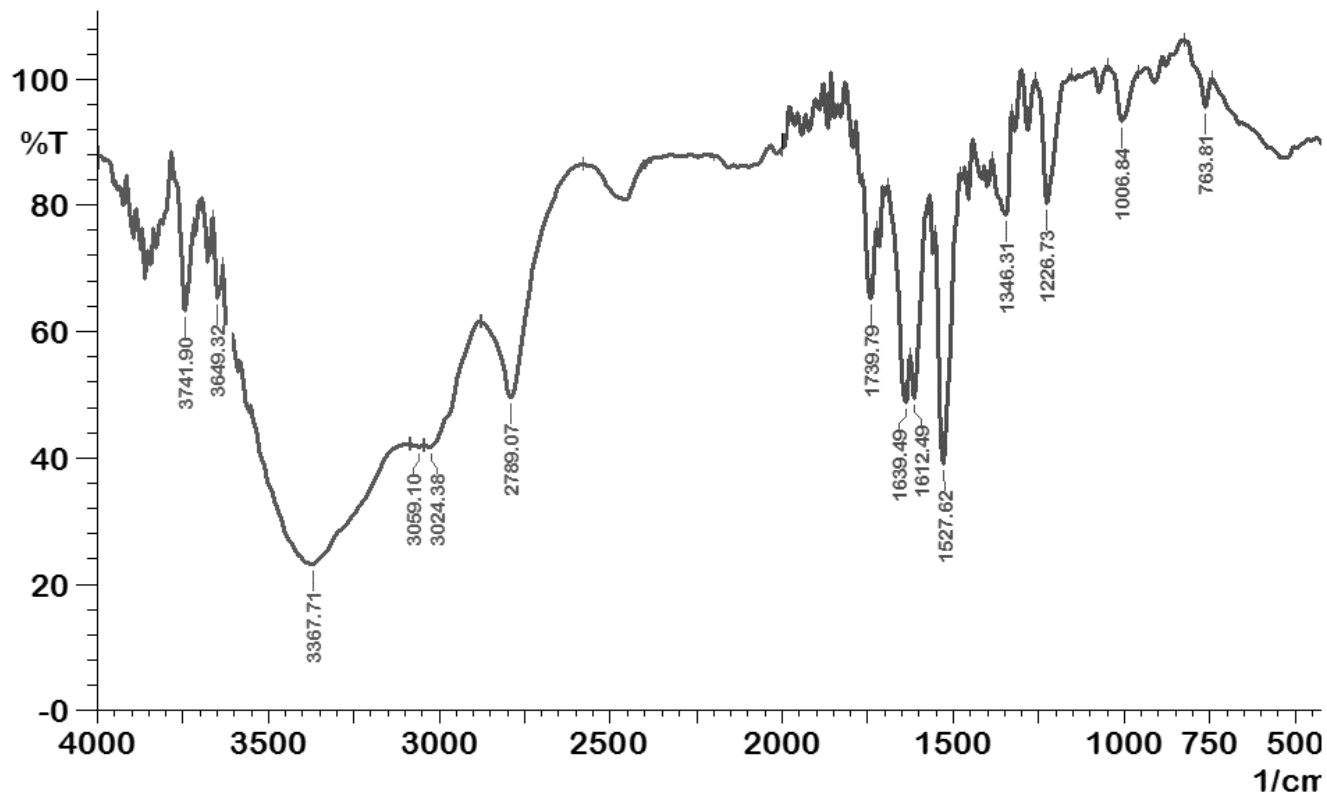

Figure S6. FTIR spectrum of [L-SnCl<sub>2</sub>] complex

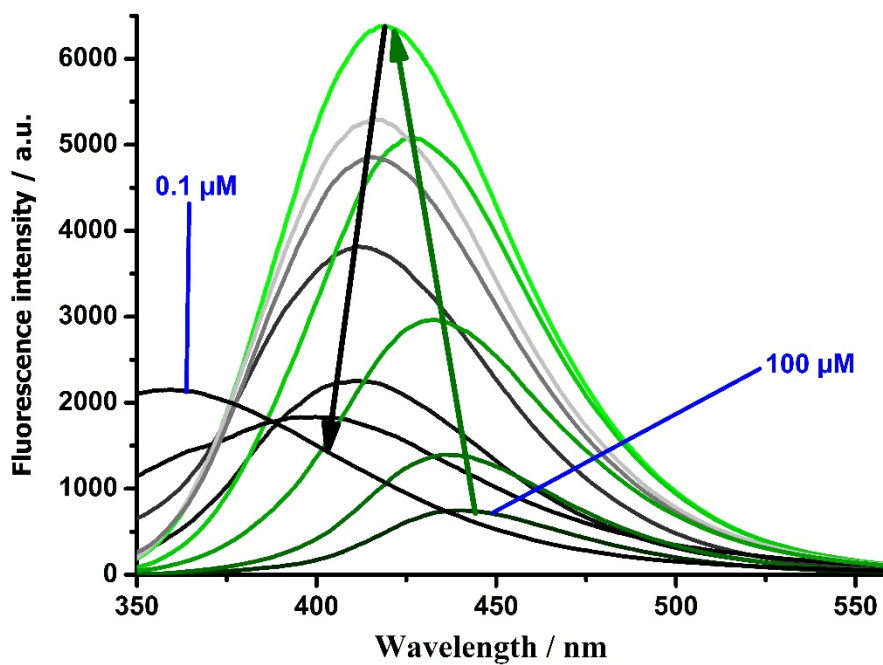

Figure S7. Change of emission spectra of L with its concentration (0.1, 0.2, 0.4, 0.75, 1.5, 3.0, 7.5, 10.0, 20.0, 50.0, 100.0 μM in acetonitrile ( $\lambda_{\text{ex}} = 330$  nm)).

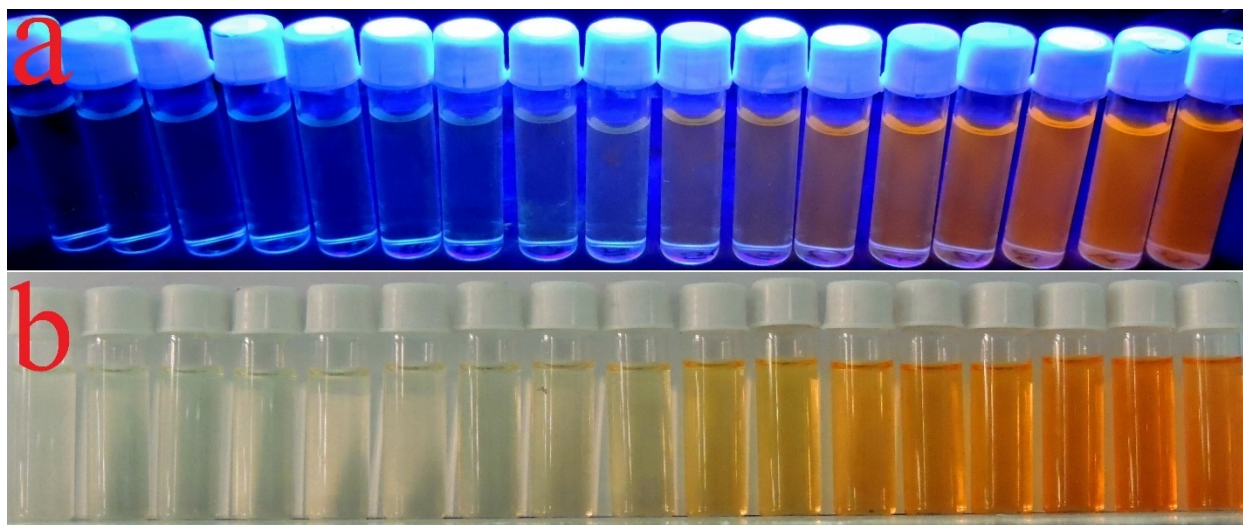

**Figure S8.** Changes of color of L (20  $\mu\text{M}$ ) upon addition of  $\text{Sn}^{2+}$  (0 to 10 equivalent, from left to right) (a) under hand held UV lamp and (b) naked eye in acetonitrile

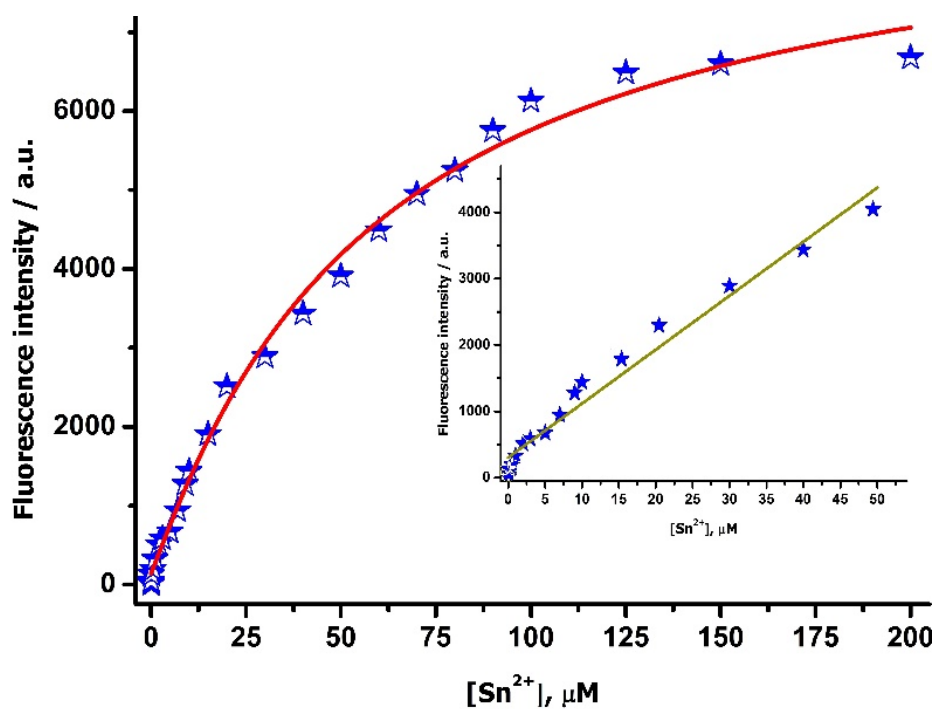

**Figure S9.** Plot of emission intensity (a.u.) vs.  $\text{Sn}^{2+}$  concentration ( $\mu\text{M}$ ) at 582nm ( $\lambda_{\text{ex}}=505$  nm). Inset shows the linear region up to 50  $\mu\text{M}$   $\text{Sn}^{2+}$  (inset, Slope= 119.06,  $R^2=0.9899$ ).

**Table S1.** Comparison of the present probe with those available in the literature

| Probe                                                                              | LOD                                                       | Solvent System                                    | Interference                                           | Additional comment(s)                                                                                                 | Ref. 15                                                   |
|------------------------------------------------------------------------------------|-----------------------------------------------------------|---------------------------------------------------|--------------------------------------------------------|-----------------------------------------------------------------------------------------------------------------------|-----------------------------------------------------------|
| <b>R1 and R2</b><br>(Coordination based, turn-on)                                  | R1 = 0.57 $\mu\text{M}$<br>and<br>R2 = 0.46 $\mu\text{M}$ | ethanol–<br>water<br>(1 : 1, v/v,<br>pH 7.04)     | $\text{Cu}^{2+}$ , $\text{Cr}^{3+}$                    | Highly pH sensitive                                                                                                   | <i>Analyst</i> <b>2014</b> , <i>139</i> ,<br>5223–5229    |
| <b>RBAP</b> (Coordination based, turn-on)                                          | 0.044 $\mu\text{M}$                                       | MeOH/ $\text{H}_2\text{O}$<br>(2:3, v/v, pH 5.95) | $\text{Al}^{3+}$ , $\text{Cr}^{3+}$ , $\text{Fe}^{3+}$ | Highly pH sensitive                                                                                                   | <i>Molecules</i> <b>2014</b> , <i>19</i> ,<br>7817-7831   |
| <b>1o</b><br>(Coordination based, photochromic)                                    | 20.0 $\mu\text{M}$                                        | Methanol                                          | -                                                      | Highly pH sensitive                                                                                                   | <i>Tetrahedron</i> <b>2014</b> , <i>70</i> ,<br>9070-9076 |
| <b>Present Probe</b><br>(Coordination based, dynamic to static excimer conversion) | 0.01 $\mu\text{M}$                                        | Acetonitrile                                      | -                                                      | can also detect $\text{Al}^{3+}$ selectively in 50% aqueous–methanol at different excitation and emission wavelengths | -                                                         |

**Table S2.** Fluorescence lifetime decay parameters of **L** and [**L**- $\text{SnCl}_2$ ]complex

| $\lambda_{\text{em}}$ |                                                          | <b>B<sub>1</sub></b> | <b>t<sub>1</sub>(ns)</b> | <b>B<sub>2</sub></b> | <b>t<sub>2</sub>(ns)</b> | <b>B<sub>3</sub></b> | <b>t<sub>3</sub>(ns)</b> | <b>t<sub>ave</sub>(ns)</b> |
|-----------------------|----------------------------------------------------------|----------------------|--------------------------|----------------------|--------------------------|----------------------|--------------------------|----------------------------|
| <b>420nm</b>          | <b>L</b>                                                 | 37.76                | 0.714                    | 40.42                | 4.942                    | 21.81                | 0.0286                   | 2.30                       |
|                       | <b>L+ SnCl<sub>2</sub>(10<math>\mu\text{M}</math>)</b>   | 16.40                | 1.535                    | 78.86                | 6.258                    | 4.74                 | 0.229                    | 5.21                       |
|                       | <b>L+ SnCl<sub>2</sub> (100<math>\mu\text{M}</math>)</b> | 44.85                | 0.681                    | 40.54                | 3.318                    | 14.61                | 0.101                    | 1.67                       |
| <b>582nm</b>          | <b>L</b>                                                 | 41.42                | 0.698                    | 27.59                | 3.166                    | 30.99                | 0.120                    | 1.20                       |
|                       | <b>L+SnCl<sub>2</sub> (10<math>\mu\text{M}</math>)</b>   | 33.28                | 0.791                    | 51.47                | 4.527                    | 15.24                | 0.137                    | 2.61                       |
|                       | <b>L+SnCl<sub>2</sub> (100<math>\mu\text{M}</math>)</b>  | 28.47                | 0.387                    | 71.53                | 5.389                    | -                    | -                        | 3.97                       |

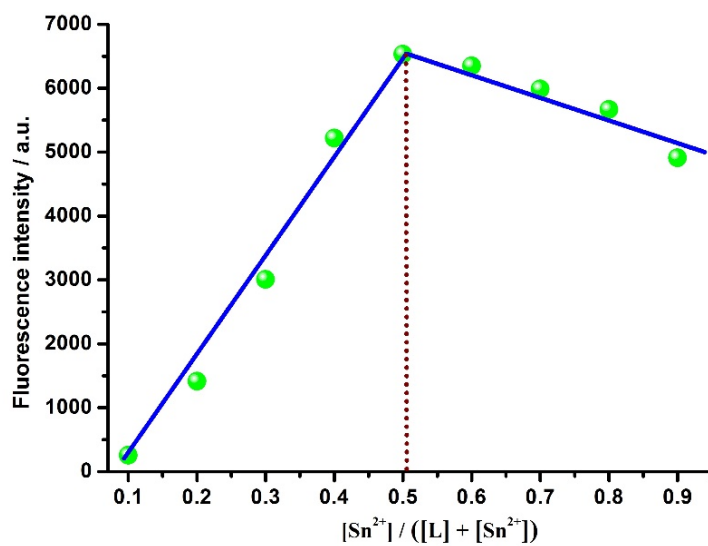

**Figure S10.** Job's plot for determination of stoichiometry of the  $[L-SnCl_2]$  complex in acetonitrile

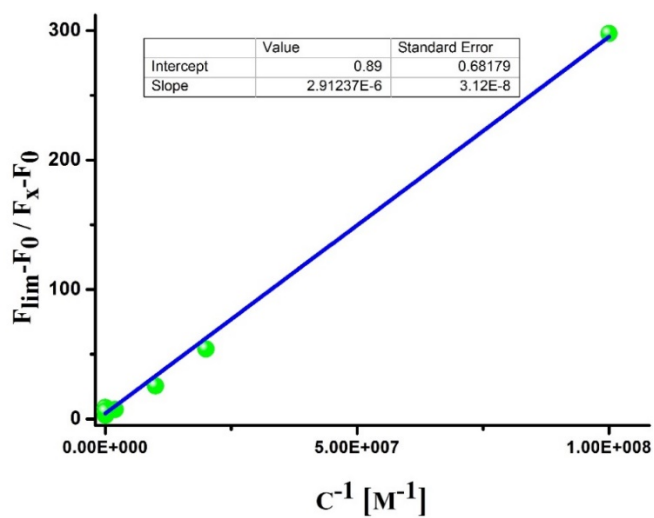

**Figure S11.** Determination of binding constant of L for  $Sn^{2+}$  by fluorescence method ( $R^2=0.89$ )

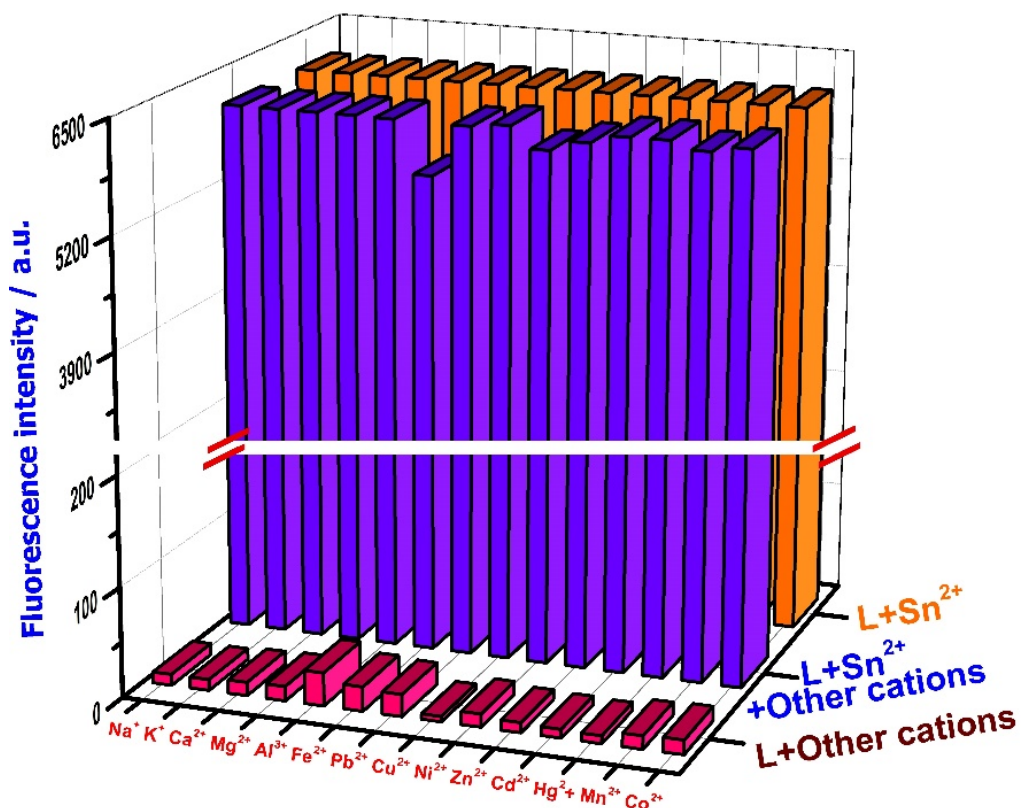

**Figure S12.** Selectivity of L (20  $\mu\text{M}$ ) for  $\text{Sn}^{2+}$  in a competing environment in presence of other cations (100  $\mu\text{M}$ ) in acetonitrile,  $[\text{SnCl}_2] = 100 \mu\text{M}$

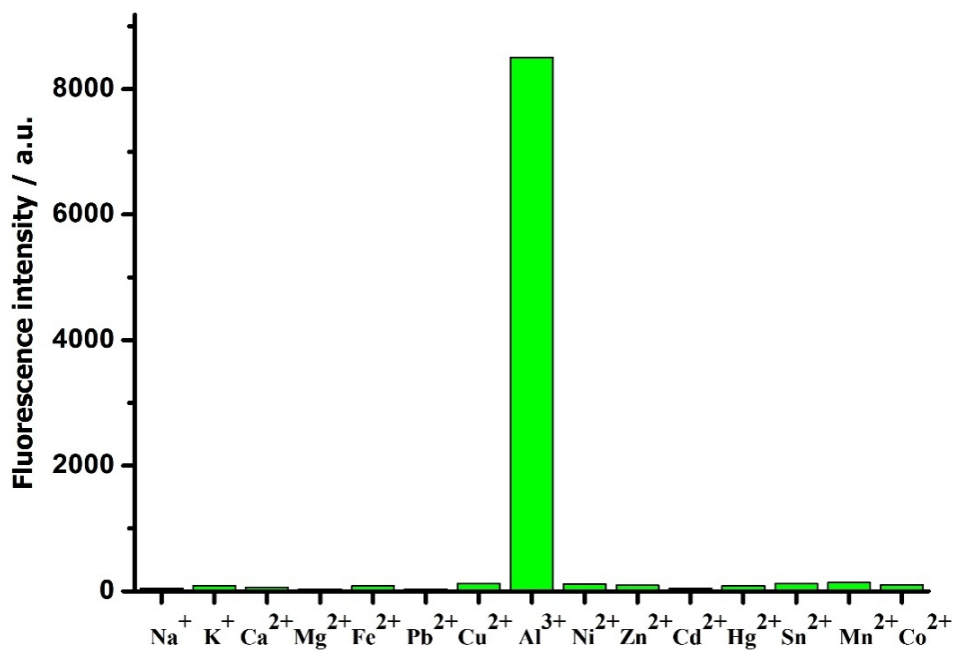

**Figure S13.** Selectivity of L (20  $\mu\text{M}$ ) for  $\text{Al}^{3+}$  (100  $\mu\text{M}$ ) in 50% aqueous-methanol (v/v) ( $[\text{cations}] = 100 \mu\text{M}$ ,  $\lambda_{\text{ex}} = 375 \text{ nm}$ ,  $\lambda_{\text{em}} = 501 \text{ nm}$ )



**Table S3.** Frontier molecular orbitals (MOs) of **L** and their energy levels (in a.u), Calculations are based on ground state geometry from DFT at B3LYP/3-21G /level using Gaussian 09.

| Frontier orbital | Energy (a.u.) | Energy optimized geometry                                                           |
|------------------|---------------|-------------------------------------------------------------------------------------|
| LUMO             | -0.08027      | 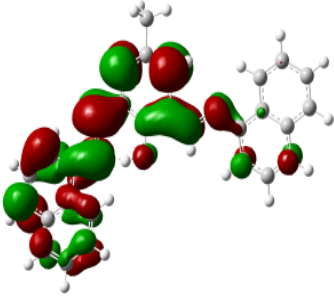  |
| HOMO             | -0.19611      |  |

**Table S4.** Frontier molecular orbitals (MOs) of **L** and their energy levels (in a.u), Calculations are based on ground state geometry using TDDFT at B3LYP/3-21G /level using Gaussian 09.

| Frontier orbital | Energy (a.u.) | Energy optimized geometry                                                            |
|------------------|---------------|--------------------------------------------------------------------------------------|
| LUMO+1           | -0.05207      | 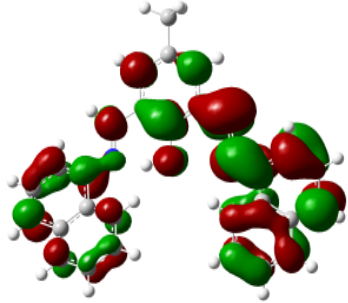   |
| LUMO             | -0.07752      |   |
| HOMO             | -0.19312      |  |
| HOMO-1           | -0.21052      |  |

**Table S5.** Frontier molecular orbitals (MOs) of [L-SnCl<sub>2</sub>]complex and their energy levels (in a.u), Calculations are based on ground state geometry from DFT at B3LYP/6-31G /level using Gaussian 09.

| Frontier orbital | Energy (a.u.) | Energy optimized geometry                                                            |
|------------------|---------------|--------------------------------------------------------------------------------------|
| LUMO+1           | -0.09995      | 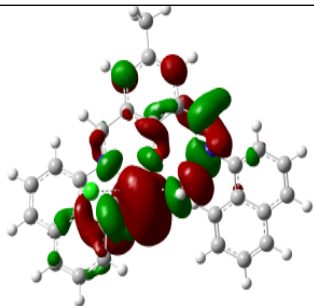   |
| LUMO             | -0.12055      |   |
| HOMO             | -0.1913       |  |
| HOMO-1           | -0.19554      |  |

**Table S6.** Frontier molecular orbitals (MOs) of [L-SnCl<sub>2</sub>] complex and their energy levels (in a. u), Calculations are based on ground state geometry by TDDFT at B3LYP/6-31G /level using Gaussian '09

| Frontier orbital | Energy (a.u.) | Energy optimized geometry                                                            |
|------------------|---------------|--------------------------------------------------------------------------------------|
| LUMO+1           | -0.09583      | 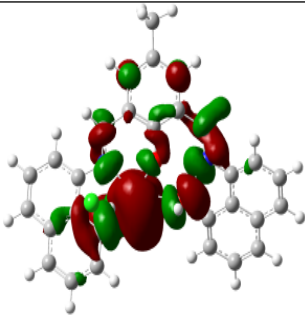   |
| LUMO             | -0.17919      |   |
| HOMO             | -0.20939      |  |
| HOMO-1           | -0.22437      |  |

**Table S7.** Vertical excitation energies ( $E_{\text{ex}}$ ), oscillator strengths ( $f$ ), and key transitions of the lowest few excited singlets generated from TDDFT calculations for **L** in acetonitrile.

| Excitation (eV) | $\lambda_{\text{ex}}$ (nm) | Osc. Strength( $f$ ) | Key transitions  | CI                        |
|-----------------|----------------------------|----------------------|------------------|---------------------------|
| 2.6227 eV       | 472.74 nm                  | $f=0.6390$           | HOMO-LUMO        | 0.62383                   |
| 2.7489 eV       | 451.04 nm                  | $f=0.4562$           | HOMO-1 to LUMO+1 | 0.27099, 0.61063, 0.16834 |
| 2.6575 eV       | 466.54 nm                  | $f=0.1220$           | HOMO to LUMO+1   | 0.28220, 0.18404          |
| 2.5421 eV       | 487.72 nm                  | $f=0.0102$           | HOMO-2 to LUMO   | 0.60401, 0.16972          |
| 2.4580 eV       | 504.41 nm                  | $f=0.0946$           | HOMO to LUMO+2   | 0.12996, 0.43916, 0.23093 |

**Table S8.** Selected bond lengths ( $\text{\AA}$ ) and bond angles ( $^\circ$ ) for **L**

***Bond lengths( $\text{\AA}$ )***

|            |          |            |          |             |          |             |          |
|------------|----------|------------|----------|-------------|----------|-------------|----------|
| O(1)-H(1)  | 0.82     | C(5)-C(33) | 1.449(4) | C(9)-C(16)  | 1.391(5) | C(15)-C(24) | 1.360(5) |
| O(1)-C(3)  | 1.352(4) | C(6)-C(7)  | 1.383(5) | C(10)-C(15) | 1.402(5) | C(16)-C(27) | 1.506(5) |
| N(3)-C(33) | 1.276(4) | C(6)-C(34) | 1.462(5) | C(10)-C(18) | 1.423(4) | C(17)-H(17) | 0.93     |
| N(3)-C(15) | 1.427(4) | C(7)-H(7)  | 0.931    | C(10)-C(25) | 1.414(5) | C(17)-C(22) | 1.372(5) |
| C(3)-C(5)  | 1.400(5) | C(7)-C(16) | 1.384(5) | C(33)-H(33) | 0.929    | C(18)-C(20) | 1.397(6) |
| C(3)-C(6)  | 1.396(4) | C(8)-C(12) | 1.421(5) | C(12)-C(14) | 1.370(5) | C(18)-C(32) | 1.401(6) |
| N(4)-C(12) | 1.420(4) | C(8)-C(17) | 1.411(5) | C(34)-H(34) | 0.93     | C(19)-C(23) | 1.416(5) |
| N(4)-C(34) | 1.278(4) | C(8)-C(19) | 1.419(5) | C(14)-H(14) | 0.93     | C(19)-C(30) | 1.404(5) |
| C(5)-C(9)  | 1.386(5) | C(9)-H(9)  | 0.929    | C(14)-C(21) | 1.394(5) | C(20)-H(20) | 0.93     |

|             |          |             |          |              |          |             |          |
|-------------|----------|-------------|----------|--------------|----------|-------------|----------|
| C(21)-H(21) | 0.929    | C(24)-H(24) | 0.93     | C(27)-H(27A) | 0.959    | C(30)-H(30) | 0.931    |
| C(21)-C(23) | 1.360(5) | C(24)-C(31) | 1.405(5) | C(27)-H(27B) | 0.96     | C(31)-H(31) | 0.929    |
| C(22)-H(22) | 0.929    | C(25)-H(25) | 0.93     | C(27)-H(27C) | 0.959    | C(31)-C(32) | 1.354(6) |
| C(20)-C(26) | 1.353(7) | C(25)-C(28) | 1.346(6) | C(28)-H(28)  | 0.93     | C(32)-H(32) | 0.929    |
| C(22)-C(29) | 1.389(6) | C(26)-H(26) | 0.93     | C(29)-H(29)  | 0.928    |             |          |
| C(23)-H(23) | 0.929    | C(26)-C(28) | 1.393(6) | C(29)-C(30)  | 1.358(7) |             |          |

**Bond angles(°)**

|                  |          |                  |          |                   |          |
|------------------|----------|------------------|----------|-------------------|----------|
|                  |          | C(3)-C(6)-C(34)  | 119.6(3) | H(9)-C(9)-C(16)   | 118.8    |
| H(1)-O(1)-C(3)   | 109.4    | C(7)-C(6)-C(34)  | 121.3(3) | C(15)-C(10)-C(18) | 118.9(3) |
| C(33)-N(3)-C(15) | 118.8(3) | C(6)-C(7)-H(7)   | 118.5    | C(15)-C(10)-C(25) | 123.4(3) |
| O(1)-C(3)-C(5)   | 121.3(3) | C(6)-C(7)-C(16)  | 122.9(3) | C(18)-C(10)-C(25) | 117.7(3) |
| O(1)-C(3)-C(6)   | 118.7(3) |                  |          | N(3)-C(33)-C(5)   | 123.3(3) |
| C(5)-C(3)-C(6)   | 119.9(3) | H(7)-C(7)-C(16)  | 118.5    | N(3)-C(33)-H(33)  | 118.3    |
| C(12)-N(4)-C(34) | 118.5(3) | C(12)-C(8)-C(17) | 122.8(3) | C(5)-C(33)-H(33)  | 118.4    |
| C(3)-C(5)-C(9)   | 118.8(3) | C(12)-C(8)-C(19) | 119.0(3) | N(4)-C(12)-C(8)   | 116.9(3) |
| C(3)-C(5)-C(33)  | 120.7(3) | C(17)-C(8)-C(19) | 118.2(3) |                   |          |
| C(9)-C(5)-C(33)  | 120.3(3) | C(5)-C(9)-H(9)   | 118.7    | N(4)-C(12)-C(14)  | 123.2(3) |
| C(3)-C(6)-C(7)   | 118.9(3) | C(5)-C(9)-C(16)  | 122.6(3) | C(8)-C(12)-C(14)  | 119.8(3) |

|                   |          |                   |          |                     |          |
|-------------------|----------|-------------------|----------|---------------------|----------|
| N(4)-C(34)-C(6)   | 121.7(3) | C(20)-C(18)-C(32) | 121.5(3) | C(15)-C(24)-C(31)   | 120.9(4) |
| N(4)-C(34)-H(34)  | 119.2    | C(8)-C(19)-C(23)  | 118.8(3) | H(24)-C(24)-C(31)   | 119.5    |
| C(6)-C(34)-H(34)  | 119.2    | C(8)-C(19)-C(30)  | 119.1(3) | C(10)-C(25)-H(25)   | 119.7    |
| C(12)-C(14)-H(14) | 119.4    | C(23)-C(19)-C(30) | 122.1(3) | C(10)-C(25)-C(28)   | 120.6(3) |
| C(12)-C(14)-C(21) | 121.2(3) | C(18)-C(20)-H(20) | 119.3    | H(25)-C(25)-C(28)   | 119.7    |
| H(14)-C(14)-C(21) | 119.3    | C(18)-C(20)-C(26) | 121.5(4) | C(20)-C(26)-H(26)   | 120.4    |
| N(3)-C(15)-C(10)  | 117.5(3) | H(20)-C(20)-C(26) | 119.3    | C(20)-C(26)-C(28)   | 119.2(4) |
| N(3)-C(15)-C(24)  | 122.4(3) | C(14)-C(21)-H(21) | 119.8    | H(26)-C(26)-C(28)   | 120.4    |
| C(10)-C(15)-C(24) | 120.1(3) | C(14)-C(21)-C(23) | 120.3(3) | C(16)-C(27)-H(27A)  | 109.5    |
| C(7)-C(16)-C(9)   | 116.8(3) | H(21)-C(21)-C(23) | 119.9    | C(16)-C(27)-H(27B)  | 109.4    |
| C(7)-C(16)-C(27)  | 122.2(3) | C(17)-C(22)-H(22) | 119.8    | C(16)-C(27)-H(27C)  | 109.4    |
| C(9)-C(16)-C(27)  | 121.0(3) | C(17)-C(22)-C(29) | 120.4(4) | H(27A)-C(27)-H(27B) | 109.4    |
| C(8)-C(17)-H(17)  | 119.6    | H(22)-C(22)-C(29) | 119.7    | H(27A)-C(27)-H(27C) | 109.6    |
| C(8)-C(17)-C(22)  | 120.9(3) | C(19)-C(23)-C(21) | 120.8(3) | H(27B)-C(27)-H(27C) | 109.5    |
| H(17)-C(17)-C(22) | 119.6    | C(19)-C(23)-H(23) | 119.6    | C(25)-C(28)-C(26)   | 121.7(4) |
| C(10)-C(18)-C(20) | 119.2(3) | C(21)-C(23)-H(23) | 119.6    | C(25)-C(28)-H(28)   | 119.1    |
| C(10)-C(18)-C(32) | 119.4(3) | C(15)-C(24)-H(24) | 119.6    | C(26)-C(28)-H(28)   | 119.2    |

|                   |          |                   |          |                   |          |
|-------------------|----------|-------------------|----------|-------------------|----------|
| C(22)-C(29)-H(29) | 119.9    | C(19)-C(30)-H(30) | 119.3    | H(31)-C(31)-C(32) | 119.8    |
| C(22)-C(29)-C(30) | 120.2(4) | C(29)-C(30)-H(30) | 119.5    | C(18)-C(32)-C(31) | 120.4(4) |
| H(29)-C(29)-C(30) | 119.8    | C(24)-C(31)-H(31) | 119.9    | C(18)-C(32)-H(32) | 119.8    |
| C(19)-C(30)-C(29) | 121.2(4) | C(24)-C(31)-C(32) | 120.3(4) | C(31)-C(32)-H(32) | 119.8    |

**Table S8.** Selected crystal parameters of **L**

|                      |                                                                        |
|----------------------|------------------------------------------------------------------------|
| Empirical formula    | C <sub>29</sub> H <sub>22</sub> N <sub>2</sub> O                       |
| Formula weight       | 414.49                                                                 |
| Temperature          | 296 K                                                                  |
| Wavelength           | 0.71073 Å                                                              |
| Crystal system       | Monoclinic                                                             |
| Space group          | <i>P</i> 2 <sub>1</sub> / <i>c</i>                                     |
| Unit cell dimensions | <i>a</i> = 17.662(10) Å, <i>b</i> = 16.526(9) Å, <i>c</i> = 7.599(4) Å |
|                      | $\alpha = 90^\circ$ , $\beta = 97.592(9)^\circ$ , $\gamma = 90^\circ$  |
| Volume               | 2199(2) Å <sup>3</sup>                                                 |
| Density              | 1.252 g cm <sup>-3</sup>                                               |
| <i>Z</i>             | 4                                                                      |
| F(000)               | 872.0                                                                  |
| Theta (max)          | 25.360°                                                                |
| Index ranges         | -21 ≤ <i>h</i> ≤ 21, -19 ≤ <i>k</i> ≤ 19, -9 ≤ <i>l</i> ≤ 9            |
| Data completeness    | 0.980                                                                  |
| R indices (all data) | R1 = 0.0650, wR2 = 0.2140                                              |
